# Supplementary material for: “Click”-modification of a functionalized poly(3,4-ethylenedioxythiophene) (PEDOT) soluble in organic solvents
Source: Royal Society of Chemistry journal article supplement (doi:10.1039/c2cc17374c), 2012-01-01
Supplement: c2cc17374c.pdf [file c2cc17374c.pdf]

## Electronic Supplementary Information (ESI)

### General remarks:

5 Infrared (FT-IR) spectra were recorded on a *Perkin-Elmer* FTIR Spectrum 2000, absorptions are reported in  $\text{cm}^{-1}$ . UV-Vis spectra were recorded with a *Parkin-Elmer* Lambda 19 spectrophotometer. Electrochemistry was performed using a *Metrohm* Autolab PGSTAT 30 Potentiostat. In CV-measurements, all potentials were internally referenced to the ferrocene/ferrocenium couple ( $\text{Fc}/\text{Fc}^+$ ).

10

### Chemicals:

2,3-Dihexyl-2,3-dihydro-thieno[3,4-b][1,4]dioxine<sup>[1]</sup> **1** and 2-azidomethyl-2,3-dihydro-thieno[3,4-b][1,4]dioxine<sup>[2]</sup> **2** were synthesized according to literature. N-(3-butynyl)-phthalimide **4a** and  $\text{Cu}(\text{CH}_3\text{CN})_4\text{PF}_6$  were purchased from *Aldrich*.

15

### Figures:

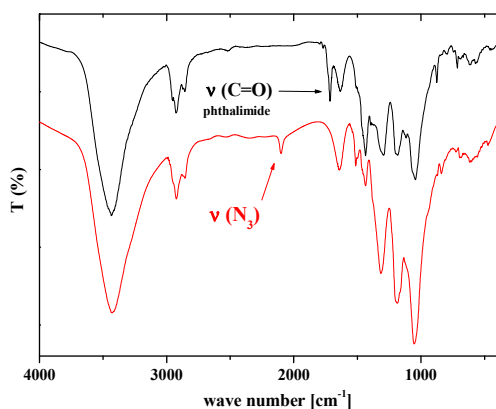

20 **Fig. S1** IR-spectrum of precursor copolymer **P3** in KBr (red) and “click”-modified copolymer **P5** after derivatization (black). The red arrow indicates the weak  $\text{N}_3$ -absorption at  $2101 \text{ cm}^{-1}$  in **P3**, the black arrow the  $\text{C}=\text{O}$ -absorption at  $1715 \text{ cm}^{-1}$  in **P4**.

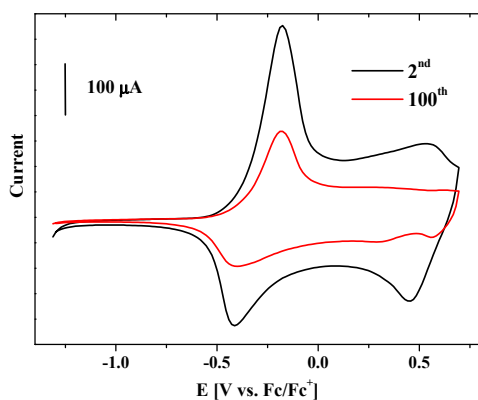

25 **Fig. S2** The electroactivity of a spin-coated copolymer **P3** film in acetonitrile/TBAHFP in the 2<sup>nd</sup> sweep compared to the electroactivity after 100 sweeps. For the preparation a copolymer **P3** solution in DCM was spin-coated on platinum disk (area =  $28.26 \text{ mm}^2$ ) for 200s at 800 rpm to give a thin copolymer film.

30

### References

- 1 D. Caras-Quintero, P. Bäuerle, *Chem. Commun.* **2004**, 926.
- 2 H.-B. Bu, G. Götz, E. Reinold, A. Vogt, S. Schmid, R. Blaco, J. L. Segura, P. Bäuerle, *Chem. Commun.* **2008**, 1320.
